# Supplementary material
Source: PubMed Central journal article supplement (PMC5828993)
Supplement: NIHMS934444-supplement-1.pdf [file NIHMS934444-supplement-1.pdf]

Supplemental Information

Supplemental Figures

Figure S1

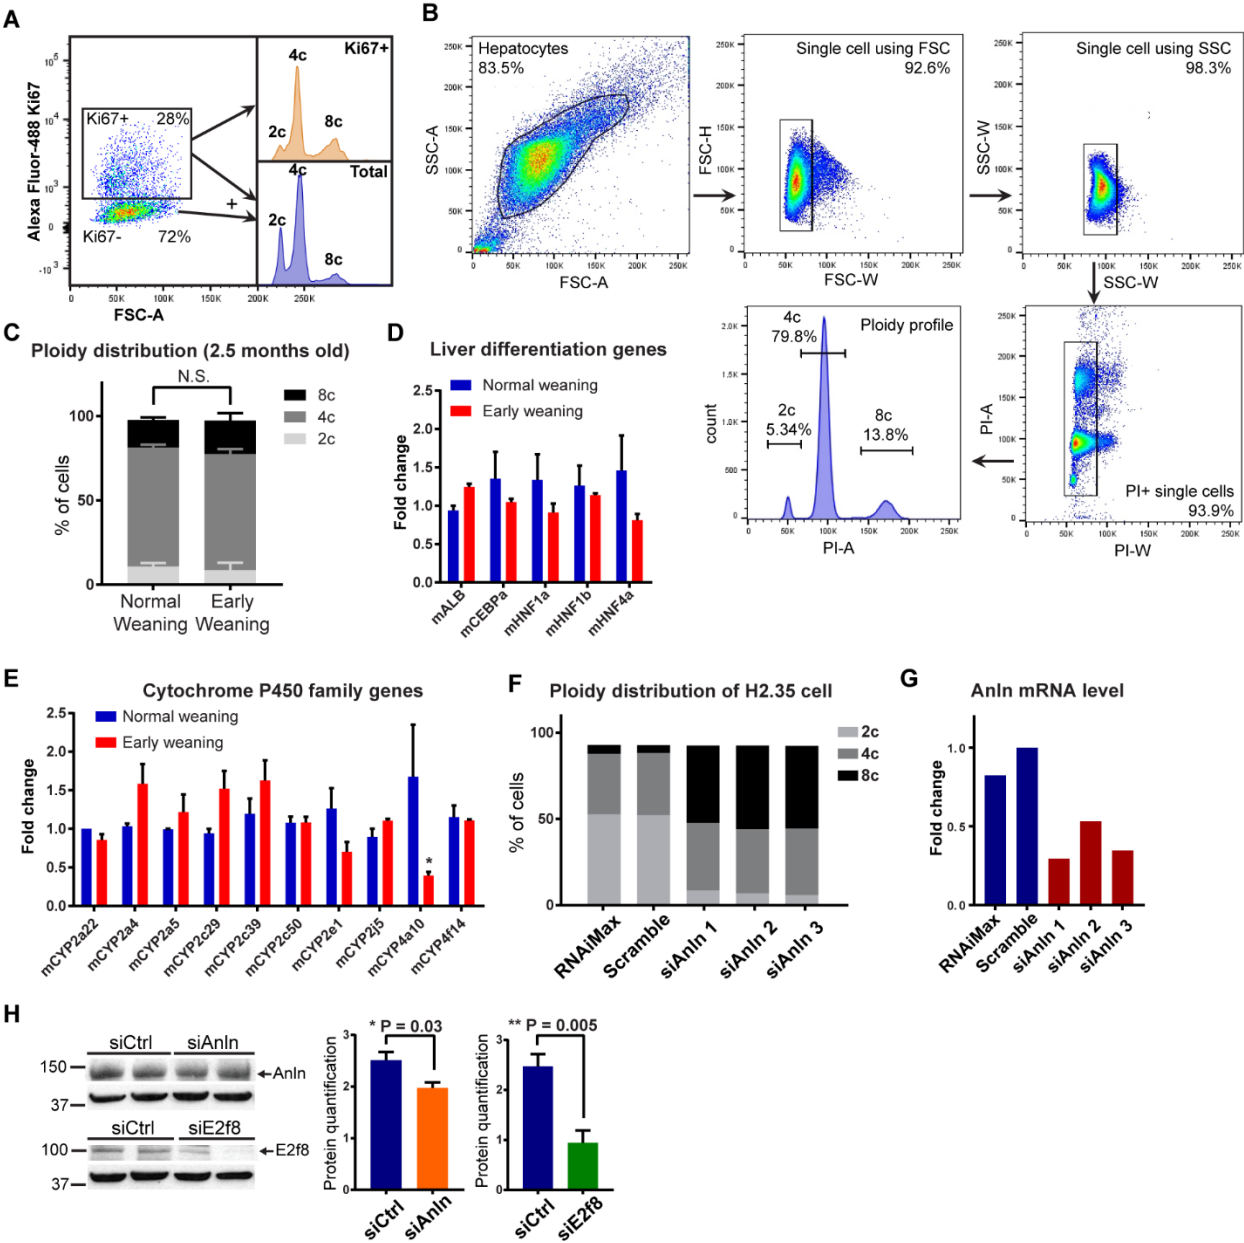

**Figure S1. *Anln* and *E2f8* siRNA knockdown altered ploidy *in vitro* and *in vivo*. Related to Figure 1.**

- (A) Primary hepatocytes from a P29 WT B6 mouse were stained with Ki67 and PI to detect the ploidy distribution of the proliferating Ki67+ population (orange histogram) and the total population (blue histogram). The Ki67+ population contains a clear group of 8c cells, demonstrating that 4c tetraploid polyploid hepatocytes are also proliferating.
- (B) Complete gating strategy for determining ploidy distribution of hepatocytes.
- (C) The ploidy distribution of differentially weaned livers at the age of 2.5 months old (n = 5), as analyzed by flow cytometry with PI staining.
- (D) qPCR for liver differentiation genes in differentially weaned livers (n = 2 mice per group).
- (E) qPCR for Cytochrome P450 family genes in normally and early weaned livers (n = 2 mice per group).
- (F) The ploidy distribution of H2.35 immortalized hepatocytes transfected with *Anln* siRNA, as analyzed by flow cytometry with PI staining.
- (G) *Anln* mRNA levels in H2.35 cells transfected with *Anln* siRNA, as detected by qPCR.
- (H) The *in vivo* knockdown efficiency of *Anln* and *E2f8* siRNAs on protein levels as assessed by western blotting. Liver tissues were collected four days after the last *in vivo* siRNA injection. The band intensities were quantified on the right.

Figure S2

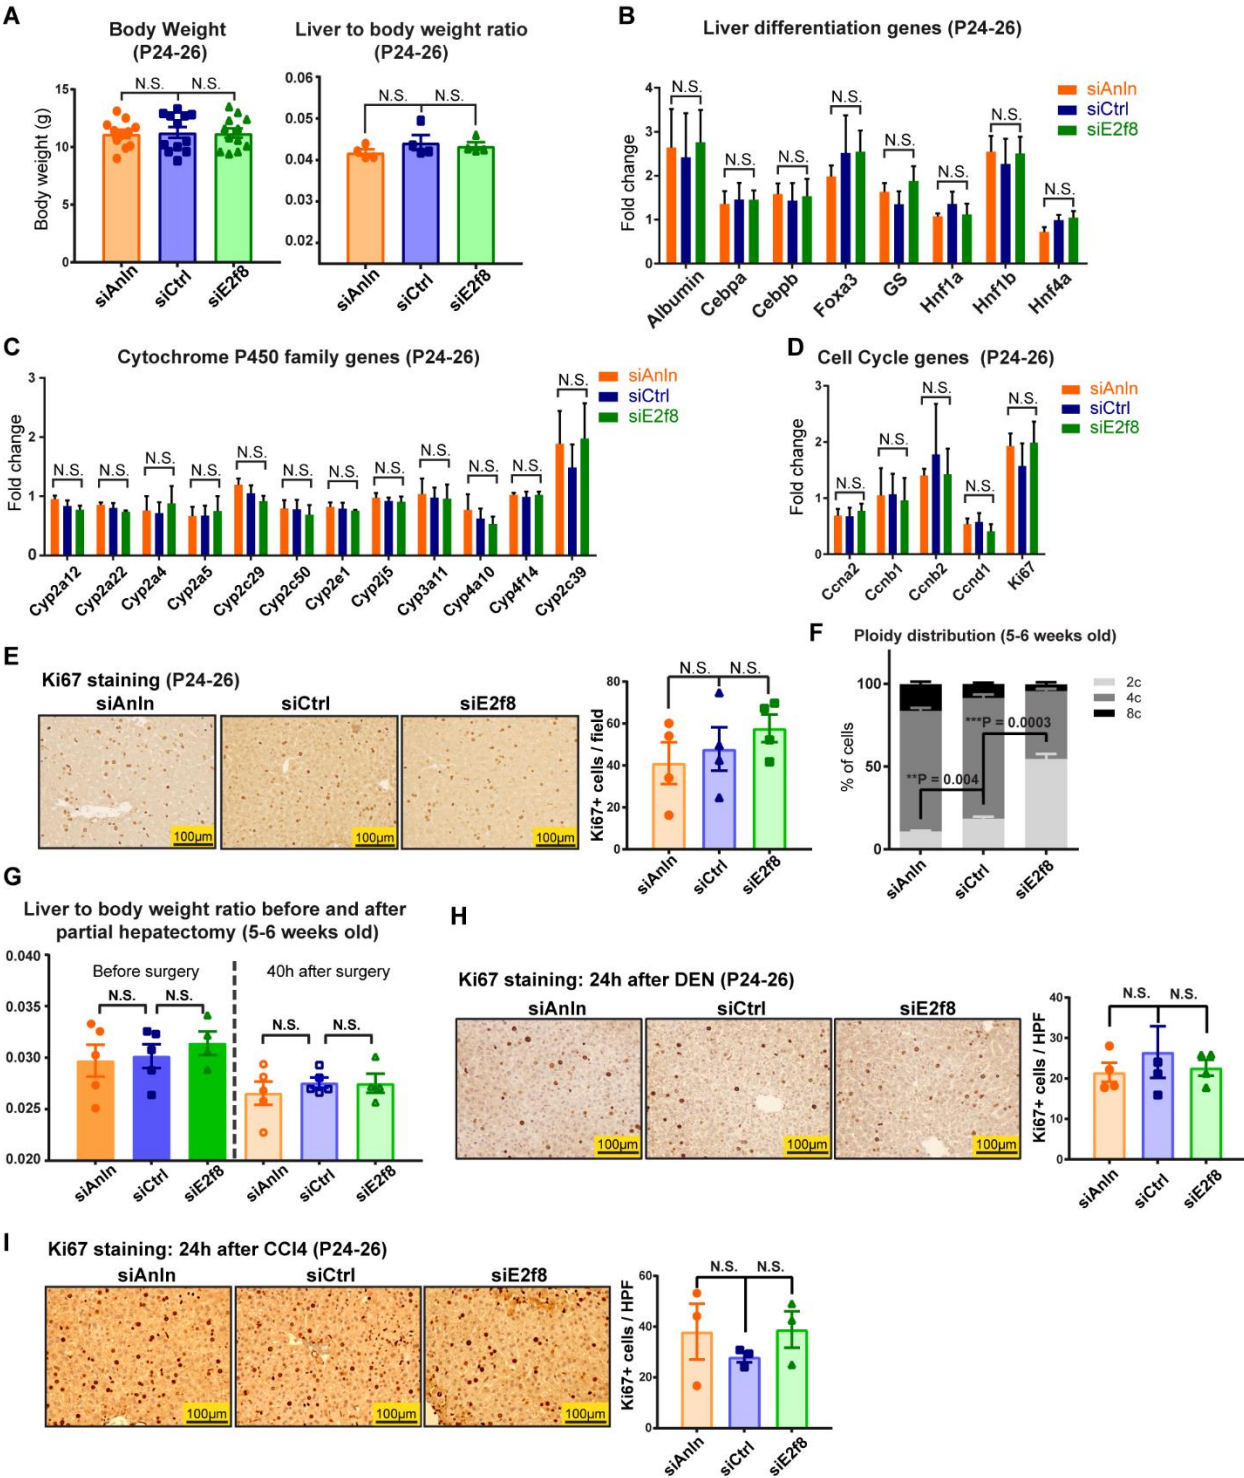

**Figure S2. siRNA treatment and altered ploidy did not impact overall liver development and regeneration. Related to Figure 2.**

- (A) Body and liver to body weight ratios of siRNA treated mice.
- (B) qPCR for liver differentiation genes in siRNA treated livers (n = 4 mice per group).
- (C) qPCR for Cytochrome P450 family genes in siRNA treated livers (n = 4 mice per group).
- (D) qPCR for cell cycle genes in siRNA treated livers (n = 4 mice per group).
- (E) Ki67 staining in siRNA treated livers (left panel), quantification on the right.
- (F) The ploidy distribution of siAnln, siCtrl or siE2f8 treated mice livers at 5-6 weeks of age (n = 3), as analyzed by flow cytometry with PI staining
- (G) Liver to body weight ratios before and 40 hours after partial hepatectomy. siRNA treated mice underwent 70% partial hepatectomy at six weeks of age and remnant livers were harvested and analyzed 40 hours after surgery.
- (H) Ki67 staining of siRNA treated livers given DEN (left panel). Four days after the last siRNA injection, these mice received one dose of DEN (75µg/g of mouse) and were euthanized 24 hours later. Ki67+ cells were quantified in the right panel.
- (I) Ki67 staining of siRNA treated livers given CCl4 (left panel). Four days after the last siRNA injection, these mice received one dose of CCl4 (100µL total, 10% CCl4 by volume) and livers were harvested 24 hours later. Ki67+ cells were quantified in the right panel.

Figure S3

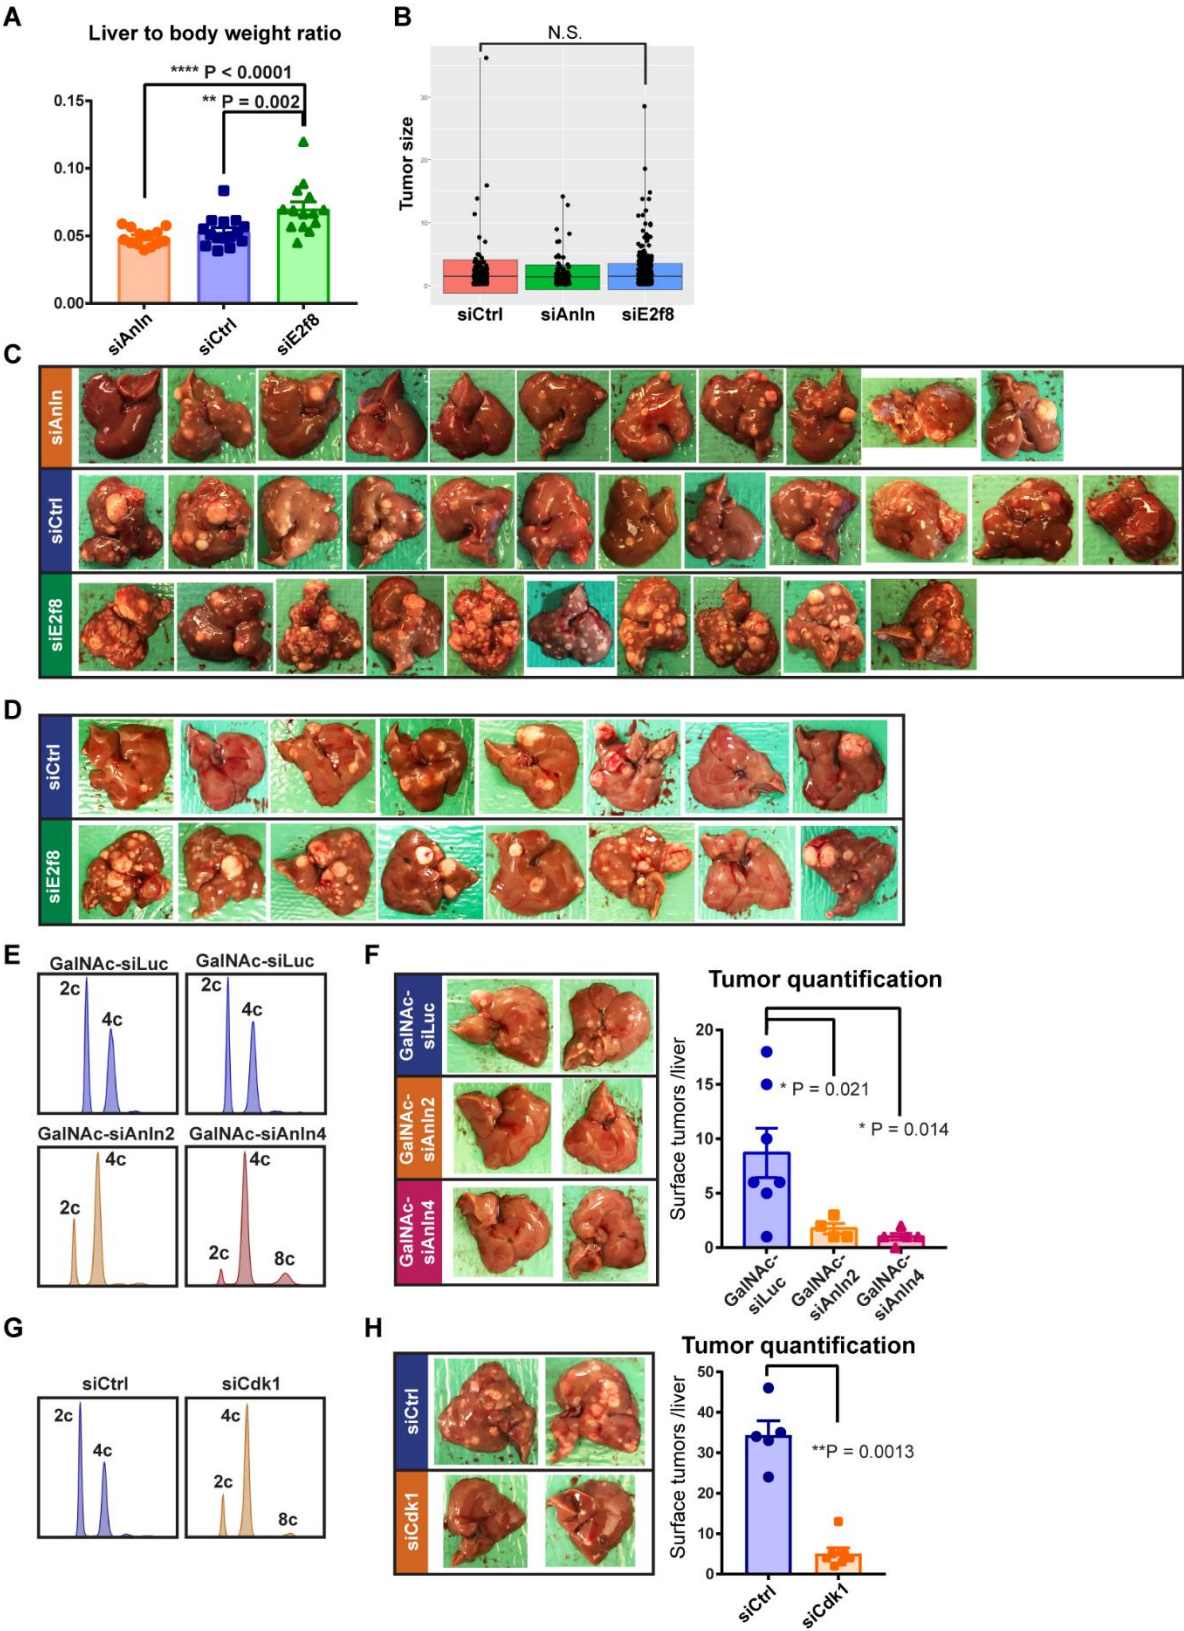

**Figure S3. The polyploid state protected against DEN-induced HCC development. Related to Figure 2.**

- (A) Liver to body weight ratios of different ploidy groups 6 months after DEN induction. The liver mass includes tumor burden and normal liver tissue.
- (B) Quantified individual tumor sizes from three ploidy groups. Tumor sizes were measured using ImageJ.
- (C) All livers from the DEN experiment (n = 11 for siAnln group, n = 12 for siCtrl group, n = 10 for siE2f8 group) are shown.
- (D) All livers treated with DEN 14 days after siRNA delivery. 14 days after four doses of siRNAs, one dose of DEN (100µg/g) was given. 7.5 months later, tumor burden was assessed (n = 8 in each group).
- (E) Ploidy distribution of *GalNAc-siLuc*, *GalNAc-siAnln#2* and *GalNAc-siAnln#4* treated livers at P26, analyzed by flow cytometry with PI staining.
- (F) Representative gross tumor burden from the *GalNAc-siRNA* DEN experiment: C3H mice were subcutaneously treated with three doses of 4.0mg/kg of *GalNAc-siLuc*, *GalNAc-siAnln#2* or *GalNAc-siAnln#4* starting at P8-10, given 4 days apart. DEN (75ug/g) was given at P26. Five months after DEN, tumors on the liver surface were quantified (right).
- (G) Ploidy distribution of siCtrl and siCdk1 treated livers at P26, analyzed by flow cytometry with PI staining.
- (H) Representative gross tumor burden from the siCdk1 DEN experiment: *Cdk1* and scramble siRNAs (siCtrl) were injected into WT C3H mice starting at P10. Four total injections (two intraperitoneal and two retro-orbital) were performed twice per week. At P26, mice were injected with DEN (75µg/g). Tumors on the liver surface were quantified at 6 months (right).

Figure S4

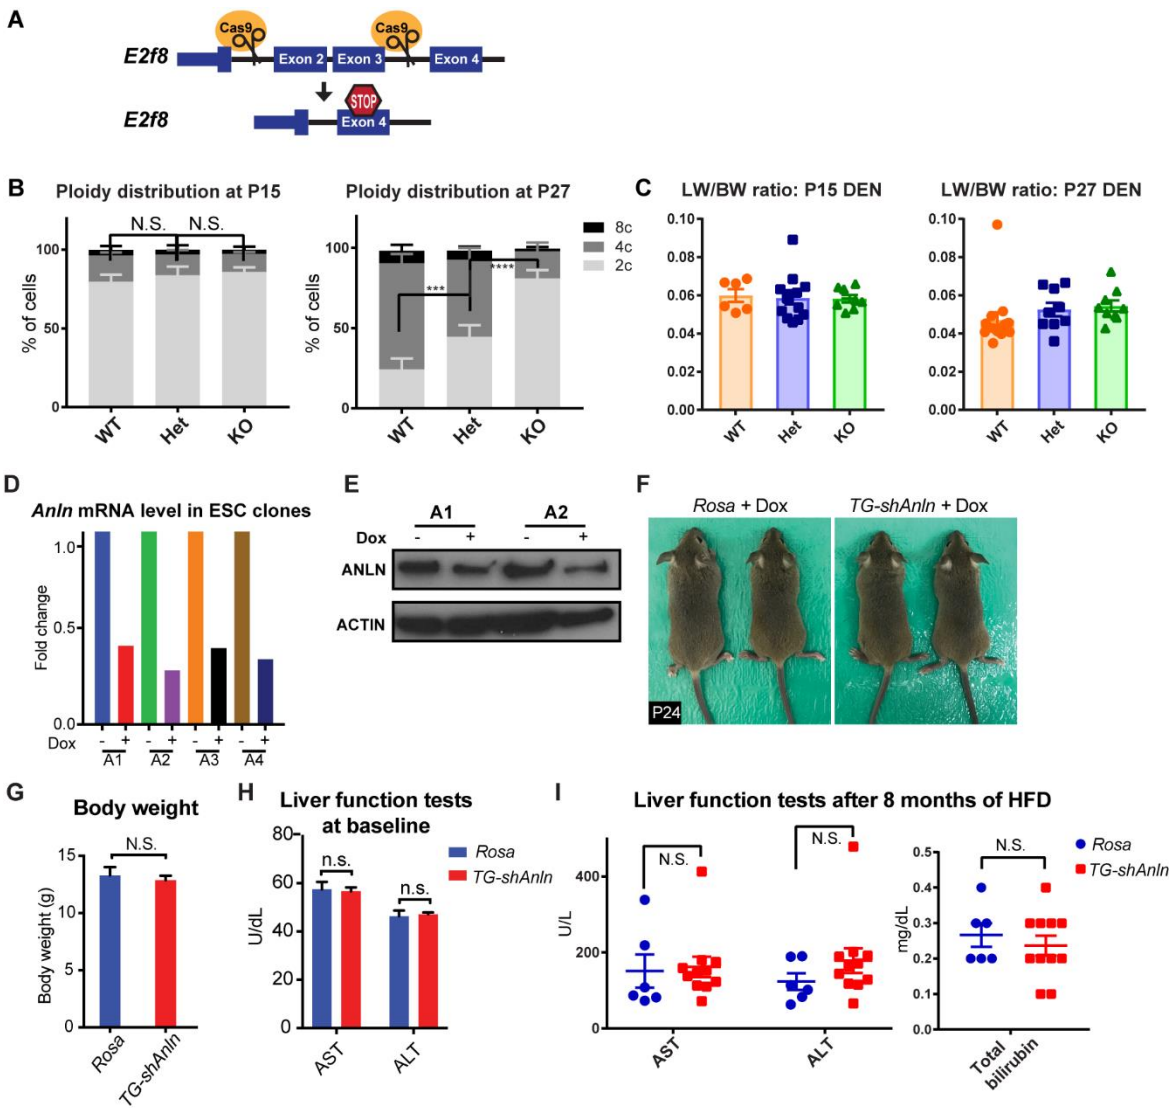

**Figure S4. Design and characterization of the *E2f8* KO and *TG-shAnln* mouse models.**

**Related to Figure 3 and Figure 4.**

- (A) CRISPR/Cas9 was used to generate whole-body *E2f8* knockout (KO) mice. Two guide RNAs were designed to target introns 1 and 3 in order to delete exon 2 and 3. Successful deletion was predicted create a premature stop codon in exon 4.
- (B) Ploidy distribution of *E2f8* WT, Het and KO livers at P15 (n = 3) or P27 (n = 6 for WT, n = 7 for Het, n = 4 for KO), analyzed by flow cytometry with PI staining.
- (C) The liver to body weight ratios of DEN treated *E2f8* WT, Het, and KO mice at six months of age. The mice were given DEN at P15 or at P27, and euthanized 4.5-5 months later.
- (D) Inducible *TG-shAnln* embryonic stem cells showing *Anln* expression levels after dox induction for 72 hours.
- (E) Western blot of Anln protein levels in embryonic stem cell clones after dox induction.
- (F) *Rosa* or *TG-shAnln* transgenic mice exposed to dox water from P0-P20 develop normally.
- (G) Body weight of the *Rosa* and *TG-shAnln* mice (n = 3) after dox water treatment from P0-P20.
- (H) AST/ALT serum liver function tests at base line in *Rosa* and *TG-shAnln* mice (n = 3) after dox treatment.
- (I) The AST/ALT and total bilirubin levels of *Rosa* and *TG-shAnln* mice after 8 months of HFD feeding.

**Figure S5**

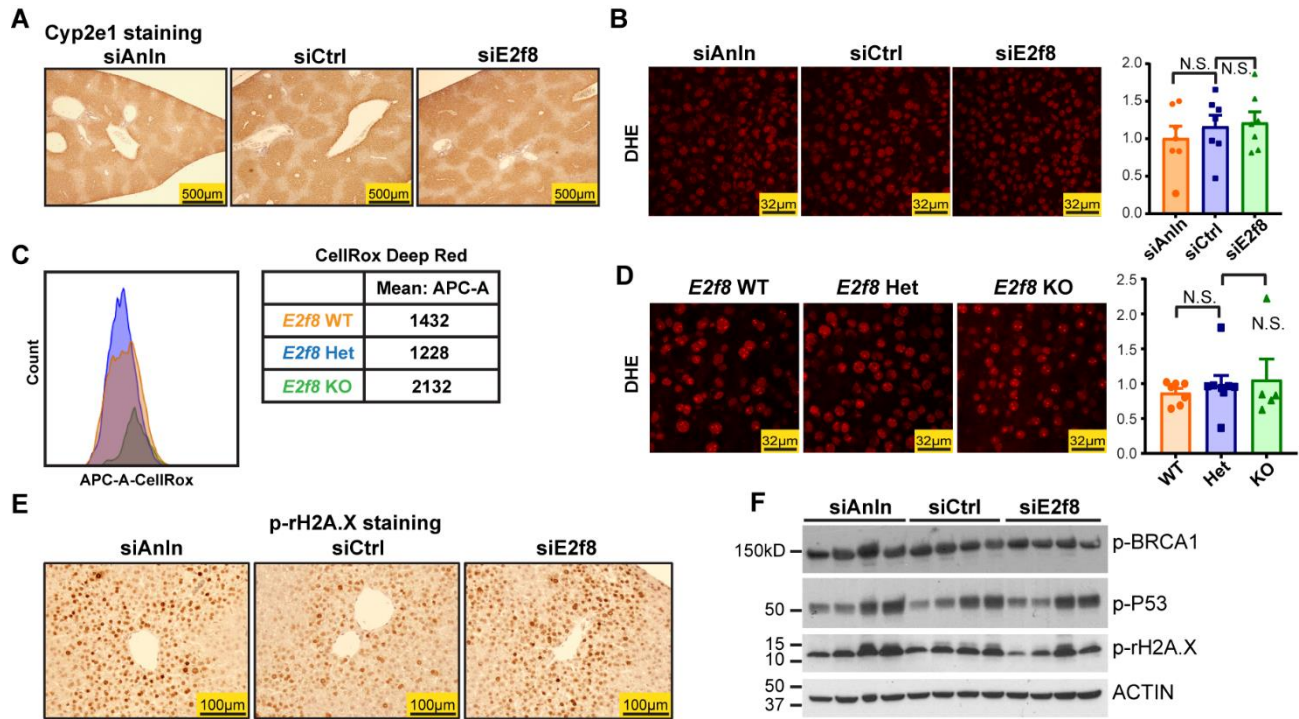

**Figure S5. After DEN, livers with altered ploidy did not exhibit differential xenobiotic metabolism, oxidative stress, or DNA damage response. Related to Figure 5.**

- (A) CYP2E1 staining in siRNA treated livers with altered ploidy.
- (B) Dihydroethidium (DHE) staining of siAnln, siCtrl or siE2f8 treated livers at P26. Staining intensities are quantified on the right, 20 cells from 5 fields in each mouse were measured and averaged.
- (C) CellRox Deep Red staining for ROS in *E2f8* WT, Het, and KO livers, as analyzed by flow cytometry. The table on the right shows the mean values for the APC-A channel, which detects CellRox.
- (D) DHE staining of *E2f8* WT, Het and KO livers at P30. Staining intensities are quantified on the right, 20 cells from 5 fields in each mouse were measured and averaged.
- (E) Four days after the last siRNA injection, one dose of DEN (75µg/g) was given. 24 hours later, livers were stained for p-γH2A.X.
- (F) The DNA damage response proteins, p-Brcal, p-p53, and p-γH2A.X, as assessed by western blots.

Figure S6

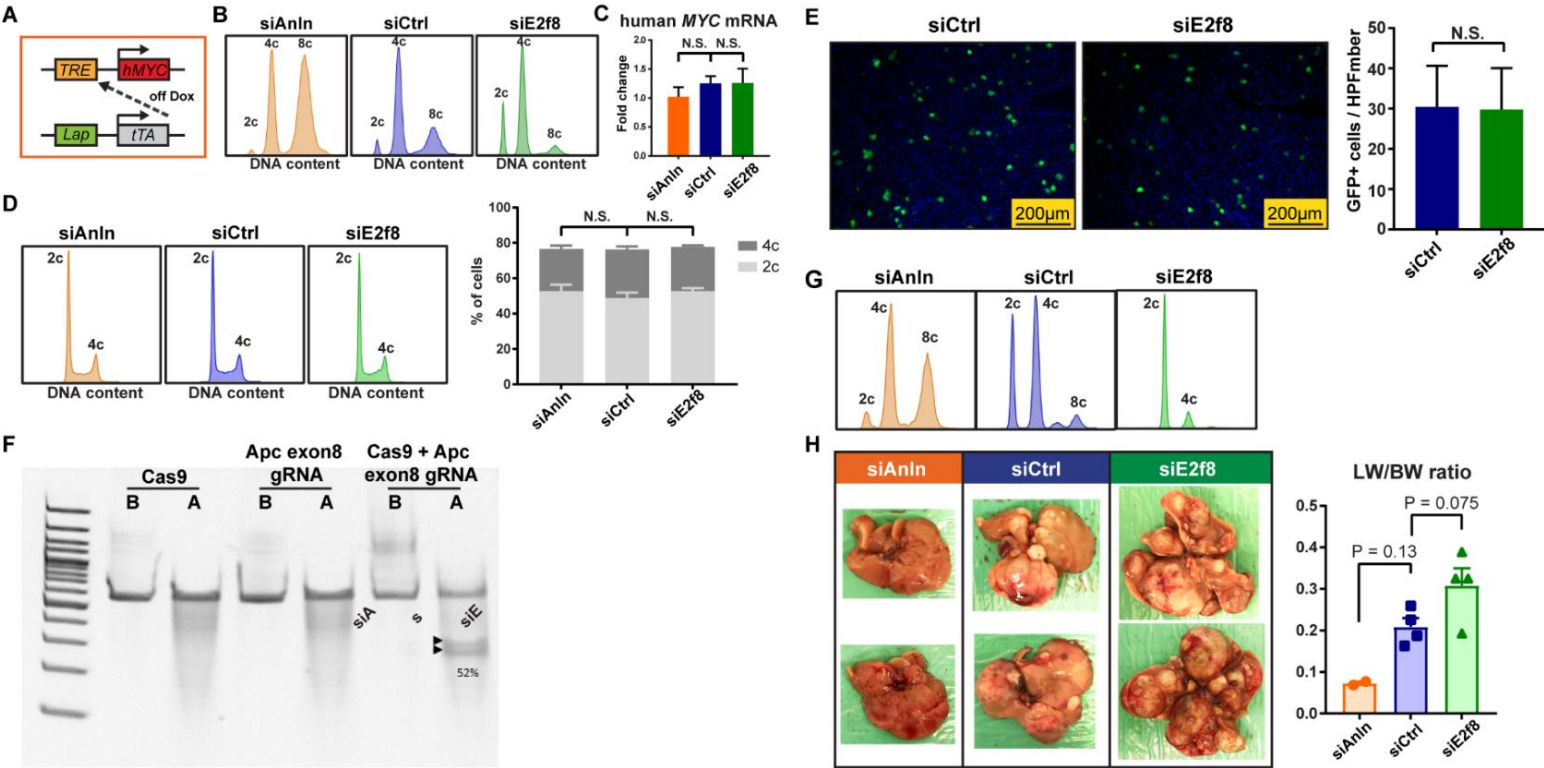

**Figure S6. Polyploids were protected from TSG loss but not oncogene activation. Related to Figure 5.**

- (A) The *LAP-tTA*; *TRE-MYC* liver cancer model. Withdrawing doxycycline drives human *MYC* expression under the control of a liver specific promoter (*LAP*).
- (B) Representative cellular ploidy of *LAP-tTA*; *TRE-MYC* livers at P30, analyzed by flow cytometry with PI staining.
- (C) Relative human *MYC* mRNA expression in *LAP-tTA*; *TRE-MYC* livers with different ploidies as measured by qPCR. Expression was analyzed at P30 in non-tumor tissues.
- (D) Representative cellular ploidy of the *MYC* tumors from different ploidy groups, analyzed by flow cytometry with PI staining. 6 tumors were analyzed from each group and the ploidy is summarized on the right.
- (E) GFP expression (left panel) in siCtrl and siE2f8 treated livers 5 days after Adenovirus-GFP ( $1.4 \times 10^8$  pfu/mouse) injection. GFP+ cells were quantified in the right panel.
- (F) The surveyor assay was used to test the efficiency of the *Apc* exon 8 sgRNA in the H2.35 cell line. B: before surveyor enzyme digestion; A: after surveyor enzyme digestion. Cutting efficiency (52%) was quantified by comparing the intensity of the cut bands.
- (G) Representative cellular ploidy of FVB livers treated with siAnln, siCtrl or siE2f8, analyzed by flow cytometry with PI staining.
- (H) Gross tumor burden from the Ad-Cas9-*gPten* plus AAV-*KPL* experiment: four doses of *Anln*, *E2f8* and scramble siRNAs (siCtrl) were injected into WT FVB strain mice starting at P10. One week later, the mice were injected with Ad-Cas9-*sgPten* ( $10^9$  pfu/mouse) and AAV-*KPL* ( $10^{12}$  pfu/mouse). Tumor burden 2 months after virus injection is shown. Liver to body weight ratio (right).

## Supplemental Table

**Table S1. Sequences, efficiencies, and R<sup>2</sup> of qPCR primers used in the paper. Related to STAR Methods.**

| Primer name | Sequence                 | Efficiency | R <sup>2</sup> |
|-------------|--------------------------|------------|----------------|
| mAnln-F     | TGACGCTCTGACATTTCTCTAC   | 95.01%     | 0.9968         |
| mAnln-R     | GTAATAGCCTTGGACTTGGAGG   |            |                |
| mE2f8-F     | TCTCAAAATTCTCCACCCGTC    | 99.90%     | 0.9968         |
| mE2f8-R     | TTGTAGTGCCCAGATCTTGC     |            |                |
| mActinB-F   | CAGAAGGAGATTACTGCTCTGGCT | 91.59%     | 0.9995         |
| mActinB-R   | TACTCCTGCTTGCTGATCCACATC |            |                |
| mALB-F      | GACCAGGAAGTGTGCAAGAA     | 95.20%     | 0.9967         |
| mALB-R      | CAAGTCTCAGCAACAGGGATAC   |            |                |
| mHNF1a-F    | CCTTGGTGGAGGAGTGTAAATAG  | 93.96%     | 0.9970         |
| mHNF1a-R    | GTTGGCAAACCAAGTTGTAGAC   |            |                |
| mHNF1b-F    | CCTCTCTCAACACCTCAACAAG   | 93.76%     | 0.9950         |
| mHNF1b-R    | GAGGATCTCCCGTTGCTTTC     |            |                |
| mHNF4a-F    | TGCCTCAAAGCCATCATCTT     | 98.59%     | 0.9986         |
| mHNF4a-R    | GTAATCCTCCAGGCTCACTTG    |            |                |
| mFOXA3-F    | GACATCGACACCTTCCAAACT    | 96.65%     | 0.9934         |
| mFOXA3-R    | TAAGCAGAGAGCGGGAATAGA    |            |                |
| mC/EBPa-F   | CAAGAAGTCGGTGGACAAGAA    | 99.55%     | 0.9982         |
| mC/EBPa-R   | CGTTGCGTTGTTTGGCTTTA     |            |                |
| mC/EBPb-F   | CGCGACAAGGCCAAGAT        | 90.18%     | 0.9967         |
| mC/EBPb-R   | GCTGCTCCACCTTCTTCTG      |            |                |
| mGS-F       | AATGGACATGGTGAGCAACC     | 91.83%     | 0.9970         |
| mGS-R       | GGTAGTGAGCCTCCACGATG     |            |                |
| mCyp2e1-F   | TTTCTGCAGGAAAGCGCG       | 96.95%     | 0.9995         |
| mCyp2e1-R   | CTGCCAAAGCCAATTGTAACAG   |            |                |
| mCyp2a12-F  | GTCAGCTCCACACTACGATATG   | 93.69%     | 0.9989         |
| mCyp2a12-R  | GCCAATCACTCGGTCAATCT     |            |                |
| mCyp2a22-F  | TGAGACAGTCAGCTCCTTACTA   | 98.31%     | 0.9998         |
| mCyp2a22-R  | GCCAATCACTCGGTCAATCT     |            |                |
| mCyp2a4-F   | CTTCATCGACTCCTTCCTCATC   | 88.08%     | 0.9999         |
| mCyp2a4-R   | GTGCCAGCAAAGAAGAGATTAG   |            |                |
| mCyp2a5-F   | CAACCCAAAGCACTTCCTAGA    | 92.38%     | 0.9993         |
| mCyp2a5-R   | CCAGTCCTTCTCCGAAACAATA   |            |                |
| mCyp2c29-F  | CCAATCCTTCACCAACTTCTCA   | 94.79%     | 0.9999         |
| mCyp2c29-R  | AGCTTCCTTCACTGCTTCATAC   |            |                |
| mCyp2c39-F  | GAGGAAGCATTCCAATGGTAGA   | 92.23%     | 0.9998         |
| mCyp2c39-R  | TGAGTGTGAAGCGCCTAATC     |            |                |
| mCyp2c50-F  | CAGAGACAACAAGCACACAC     | 97.31%     | 0.9993         |
| mCyp2c50-R  | GCCGATCACATGCTCAATTTT    |            |                |
| mCyp2j5-F   | CTGGTGGGAAGCCATAAGAGAG   | 98.33%     | 0.9999         |
| mCyp2j5-R   | CCAAAGGTGACAGAGCAAATG    |            |                |
| mCyp3a11-F  | ACCACCAGTAGCACACTTTC     | 96.95%     | 0.9991         |
| mCyp3a11-R  | CCAGGTATTCCATCTCCATCAC   |            |                |

|            |                        |        |        |
|------------|------------------------|--------|--------|
| mCyp4a10-F | CCCTGATGGACGCTCTTTAC   | 95.39% | 0.9993 |
| mCyp4a10-R | GGGTCAAACACCTCTGGATT   |        |        |
| mCyp4f14-F | TCTGTCTCATCAGCATCTTTGG | 93.34% | 0.9991 |
| mCyp4f14-R | CCGCCGAGAAGGGAATAAAT   |        |        |
| mCcna2-F   | TGAATCACCATGCTAT       | 88.60% | 0.9945 |
| mCcna2-R   | TAACCTCCATTTCCCTAAG    |        |        |
| mCcnb1-F   | CTCTGTAGTGAATATGTG     | 96.77% | 0.9811 |
| mCcnb1-R   | CATCTGAACCTGTATTAG     |        |        |
| mCcnb2-F   | TCTTGCCTGTCTCAGAAG     | 94.15% | 0.9999 |
| mCcnb2-R   | CTCCATGTAGCCTGTGTAA    |        |        |
| mKi67-F    | AGAAGTCCAGGTCTACAG     | 88.23% | 0.9871 |
| mKi67-R    | TCGTTGCTATTGCTAAGG     |        |        |
| mCcnd1-F   | TGCCATCCATGCGGAAA      | 94.37% | 0.9994 |
| mCcnd1-R   | AGCGGGAAGAACTCCTCTTC   |        |        |
| hcMYC-F    | ACCAGATCCCGGAGTTGGAA   | 99.55% | 0.9984 |
| hcMYC-R    | CGTCGTTTCCGCAACAAGTC   |        |        |
